# Supplementary material
Source: PubMed Central journal article supplement (PMC3526674)
Supplement: NIHMS416774-supplement-1_si_001.pdf [file NIHMS416774-supplement-1_si_001.pdf]

Supporting information for “Pseudouridine Monophosphate Glycosidase: Identification of a New Glycosidase Mechanism” by Siyu Huang, Nilkamal Mahanta, Tadhg P. Begley and Steven E. Ealick

**Supplementary Figure 1:** Michaelis-Menten plots for  $\Psi$ MP glycosidase and mutants.

(A)  $\Psi$ MP glycosidase. (B) K166A. (C) E31A. (D) K93A. (E) N289A.

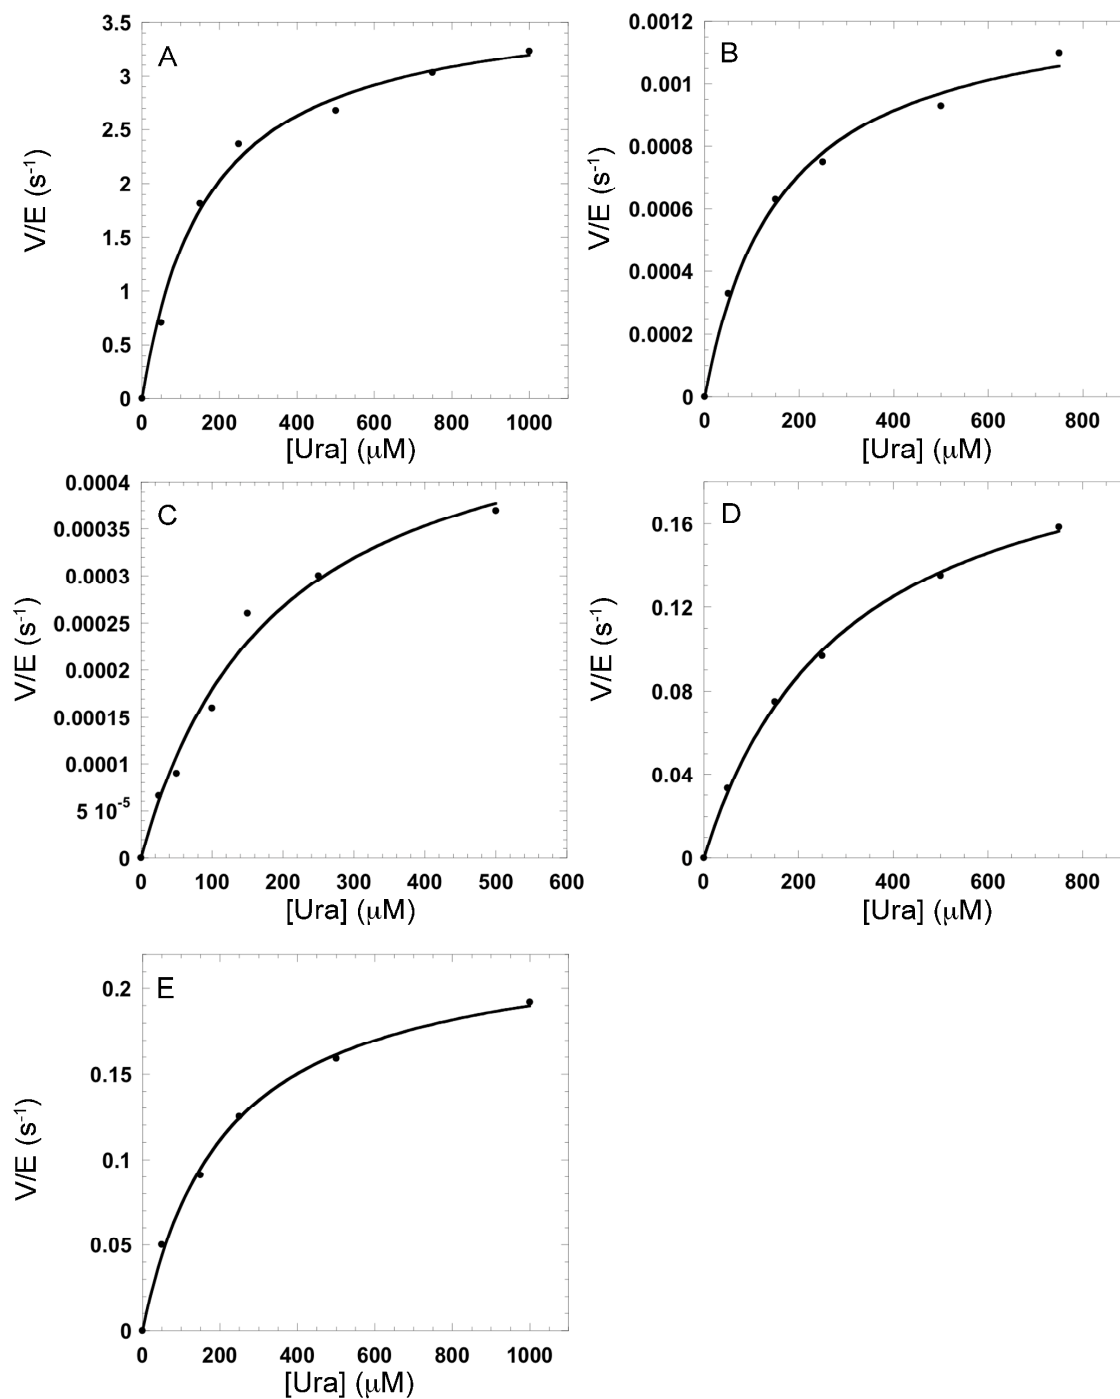

**Supplementary Table 1.** In addition to the forward and reverse primers required to introduce the mutation, a third primer was designed to screen for the presence of the mutation by colony PCR. The primers designated “sF” were paired with the T7T primer (5’-GCTAGTTATTGCTCAGCGG-3’) and the primers designated “sR” were screened with the T7Plac primer (5’-TATAGGGGAATTGTGAGCGG-3’).

| Mutant | Primer Sequences* |                                               |
|--------|-------------------|-----------------------------------------------|
| D149A  | D149A-F           | ccttcgatatttctgccgCGttgcaagaactggcaaatac      |
|        | D149A-R           | gtatttgccagttcttgcaCGcggcagaaatatcgaagg       |
|        | D149A-sF          | ccttcgatatttctgccgCG                          |
| E31A   | E31A-F            | caaaaaaccggttggtggcgctggCGtcgaccattatttctcac  |
|        | E31A-R            | gtgagaaataatggtcgaCGccagcggcacaaccggtttttg    |
|        | E31A-sF           | aaccggttggtggcgctggCG                         |
| E31L   | E31L-F            | caaaaaaccggttggtggcgctgCTGtcgaccattatttctcac  |
|        | E31L-R            | gtgagaaataatggtcgaCAGcagcggcacaaccggtttttg    |
|        | E31L-sF           | aaccggttggtggcgctgCTG                         |
| K93A   | K93A-F            | cgtgaagggcataacgtgaccGCGgtagtcgtcgcgattacc    |
|        | K93A-R            | ggtaaatcgcgacgactaacCGCggtcacgttatgcccttcacg  |
|        | K93A-sF           | aagggcataacgtgaccGCG                          |
| K93E   | K93E-F            | cgtgaagggcataacgtgaccGaGgtagtcgtcgcgattacc    |
|        | K93E-R            | ggtaaatcgcgacgactaacCtCggtcacgttatgcccttcacg  |
|        | K93E-sF           | aagggcataacgtgaccGaG                          |
| K166A  | K166A-F           | ccgttgtttgccggggcgGCGtctattctcgatttagg        |
|        | K166A-R           | cctaaatcgagaatagaCGCcgccccggcacaacaacgg       |
|        | K166A-sF          | ttgtttgcccggggcgGCG                           |
| H137A  | H137A-F           | ccgggggaattggtggtgtgGCGcgcggggcggaacataccttcg |
|        | H137A-R           | cgaaggtatgtccgccccgcgCGCcacaccaccaattcccccg   |
|        | H147A-sF          | ggggaattggtggtgtgGCG                          |

|       |          |                                             |
|-------|----------|---------------------------------------------|
| H137N | H137N-F  | ccgggggaattggtggtgAaCcgcggggcggaacatacctcg  |
|       | H137N-R  | cgaaggtatgtccgccccgcgGtTcacaccaccaattccccgg |
|       | H137N-sF | ggggaattggtggtgAaC                          |
| N289A | N289A-F  | cgtgacagcctgaaatccGC Gatccagctggtgtcaacaacg |
|       | N289A-R  | cgtgtgaacaccagctggatCGCggattcaggctgcaccg    |
|       | N289A-sR | tgaacaccagctggatCGC                         |
